# Supplementary material for: Extensive transcriptomic and epigenomic remodelling occurs during Arabidopsis thaliana germination
Source: PubMed Central journal article supplement (PMC5599894; doi:10.1186/s13059-017-1302-3), 2017-09-15
Supplement: 13059_2017_1302_MOESM2_ESM.pdf [file 13059_2017_1302_MOESM2_ESM.pdf]

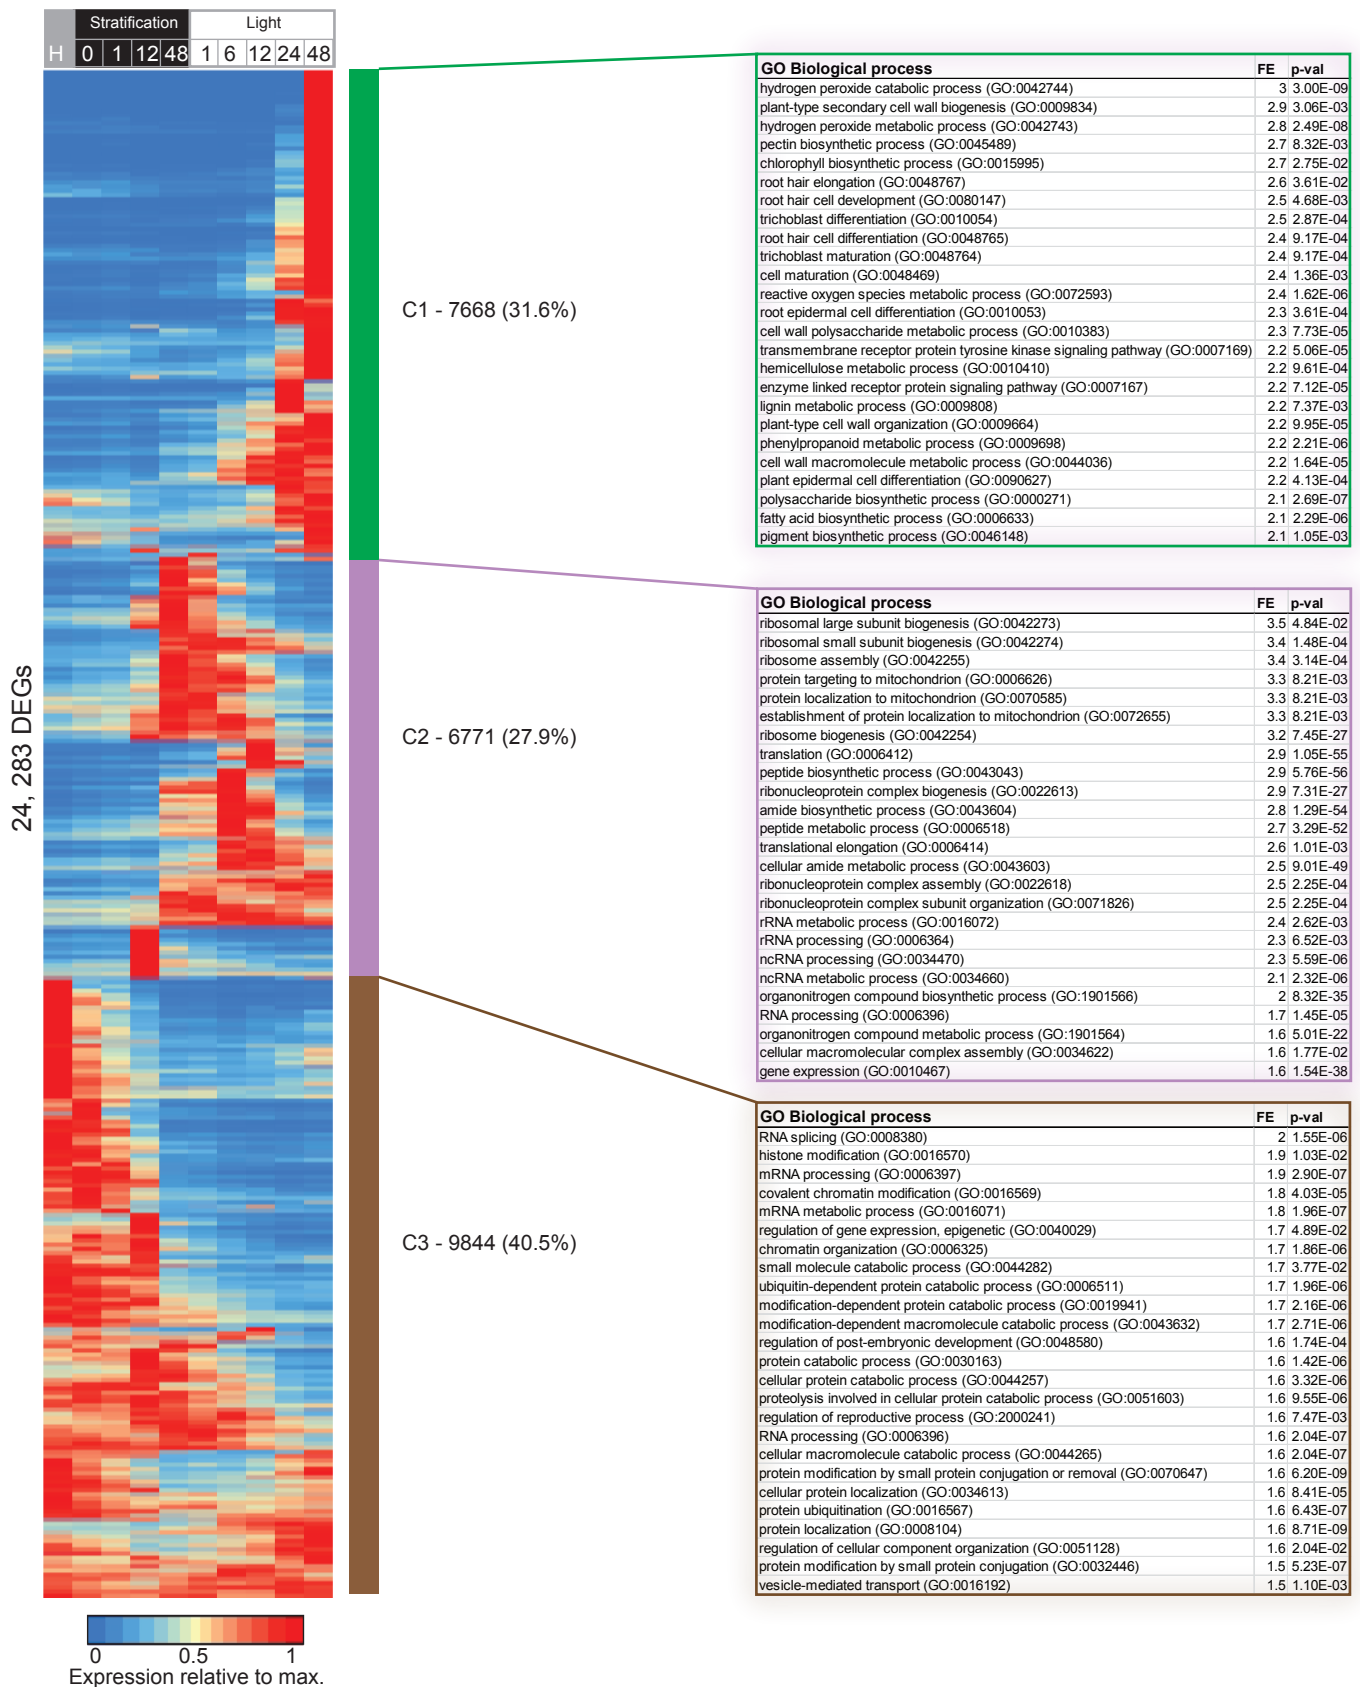

**Fig. S1** Transcriptomic responses over seed germination. The 24,283 differentially expressed genes (24,120 from Araport11 and 163 newly identified unannotated transcripts) were hierarchically clustered and GO Enrichment (Biological process) was carried out for the genes in each of the clusters. The top 25 significantly over-represented ( $p < 0.01$ ) GO terms based on fold-enrichment (FE) are shown as well as the associated p-values.

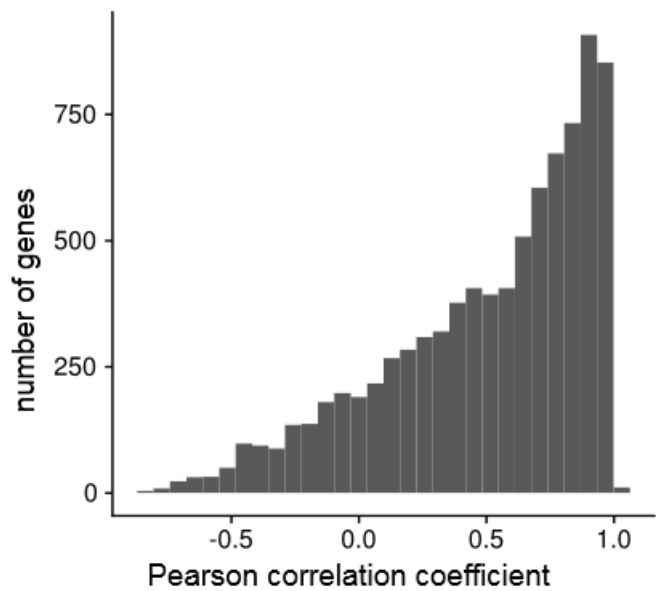

**Fig. S2** Correlation between the main two isoforms of genes with multiple variants during germination.

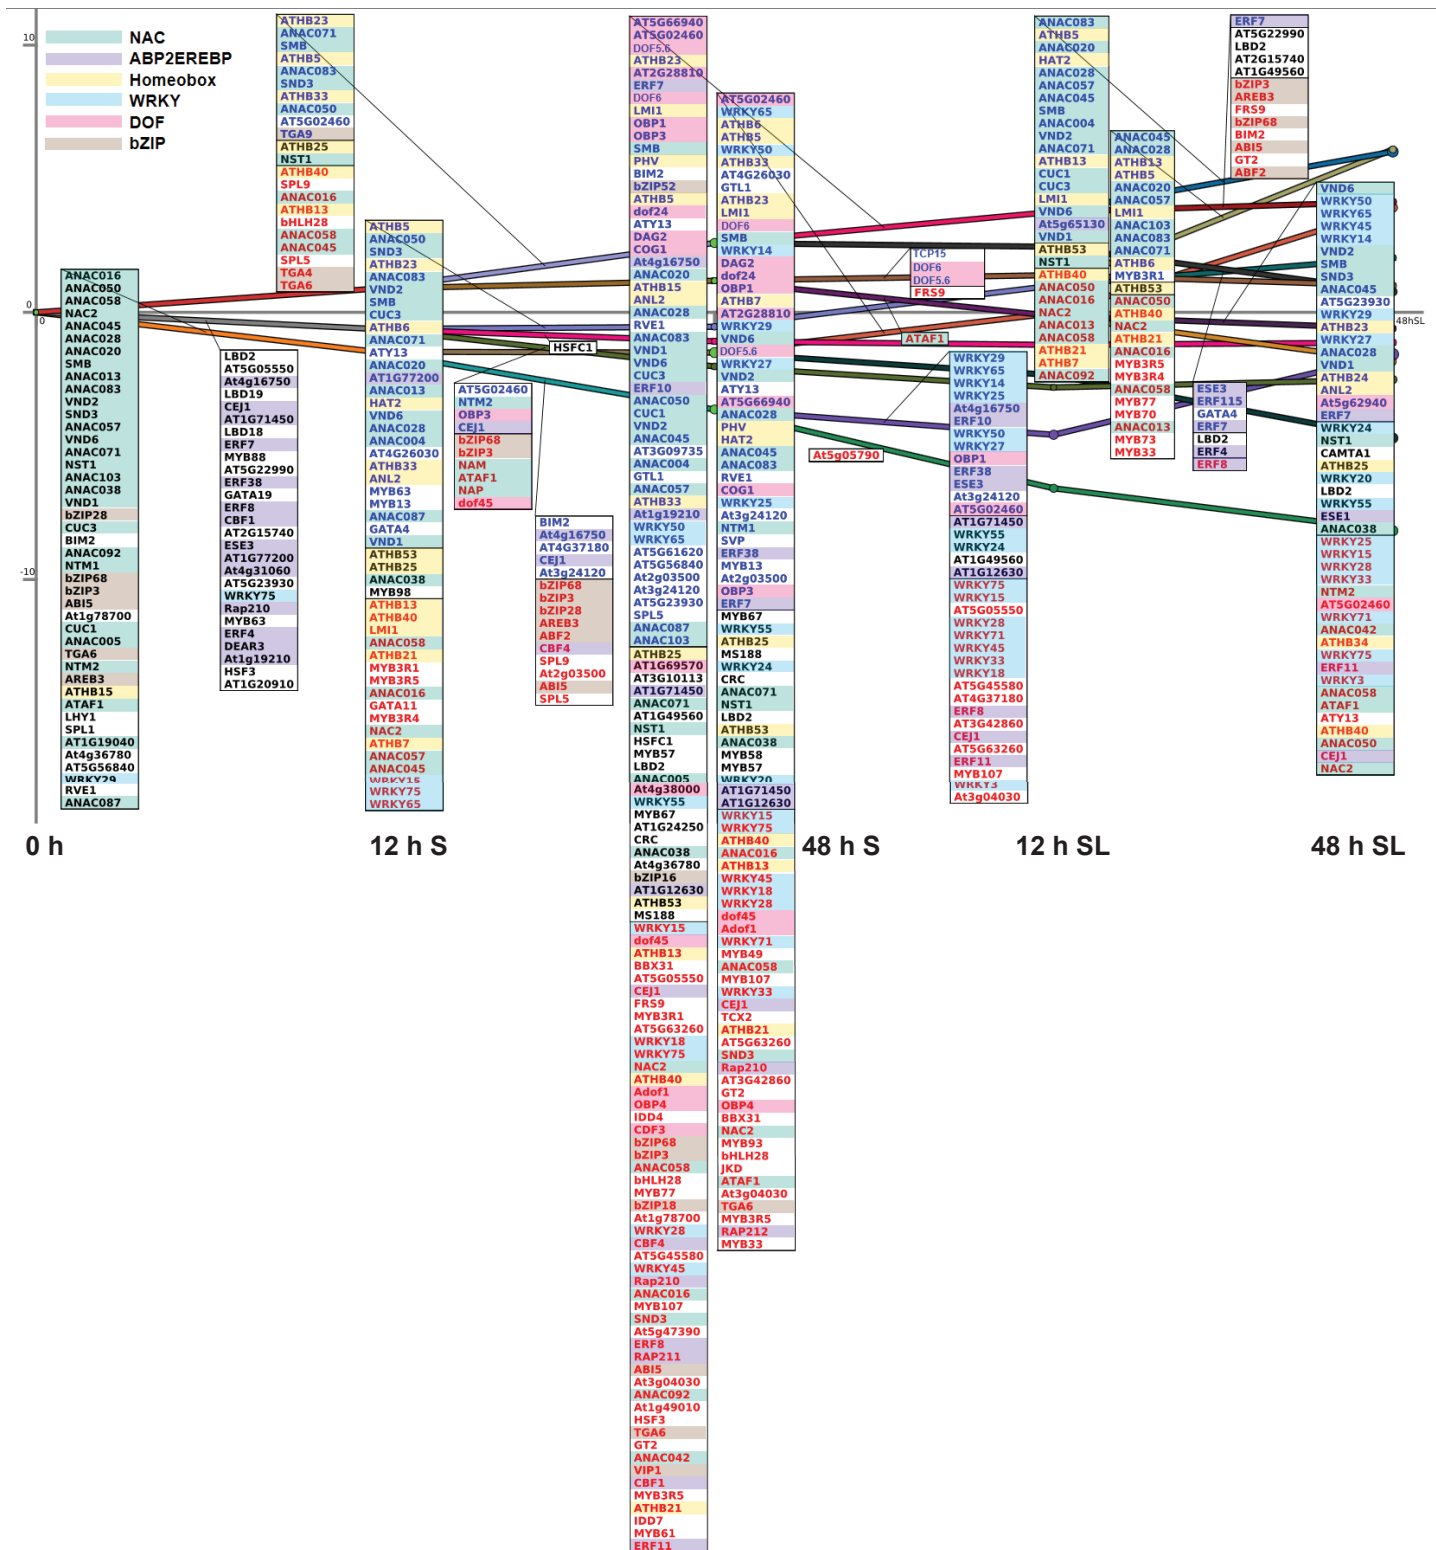

**Fig. S3** Modelling the TF network controlling germination. DREM model annotated with TFs based on DAP-seq binding data. In order to simplify the model only four time points were used to calculate the log<sub>2</sub> fold changes of DEGs relative to 0 h: 12 h S, 48 h S, 12 h SL and 48 h SL. Transcriptionally up-regulated TFs are coloured in blue, transcriptionally down-regulated TFs are shown in red. TFs belonging to major families are highlighted in the colours indicated.



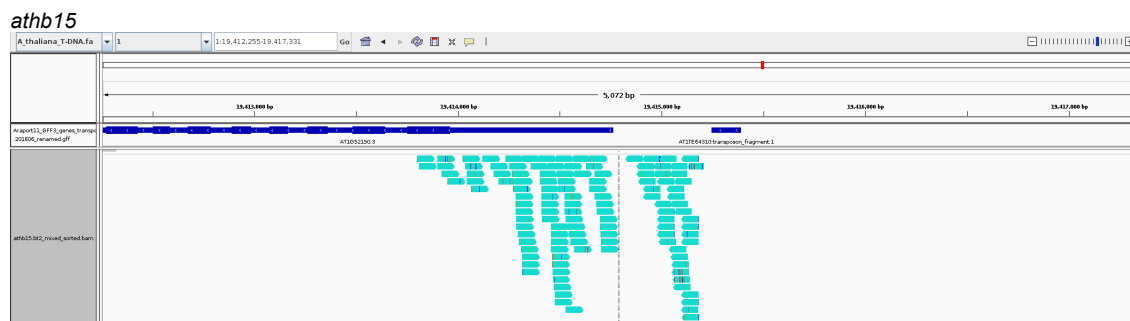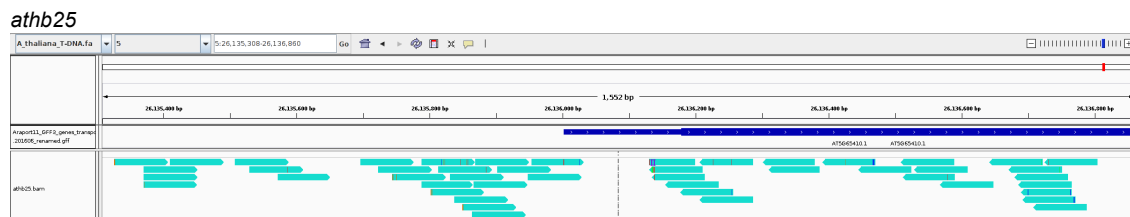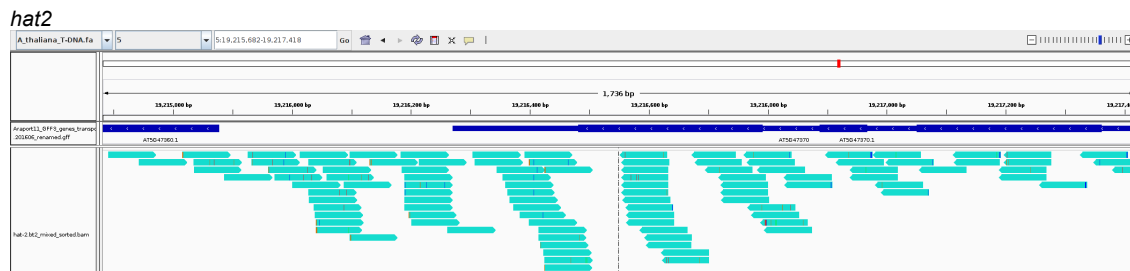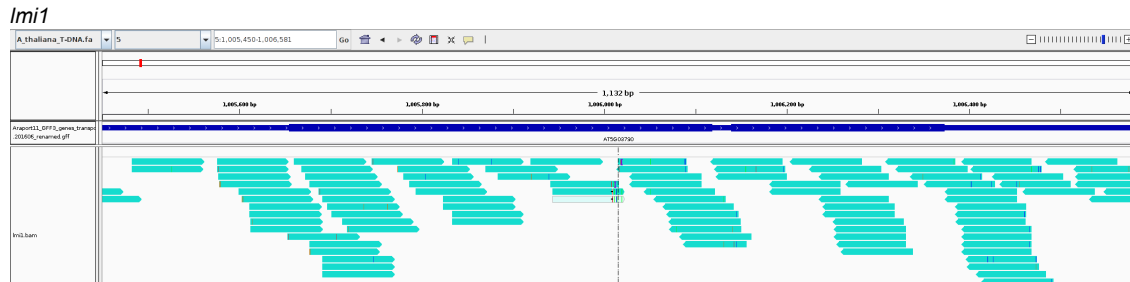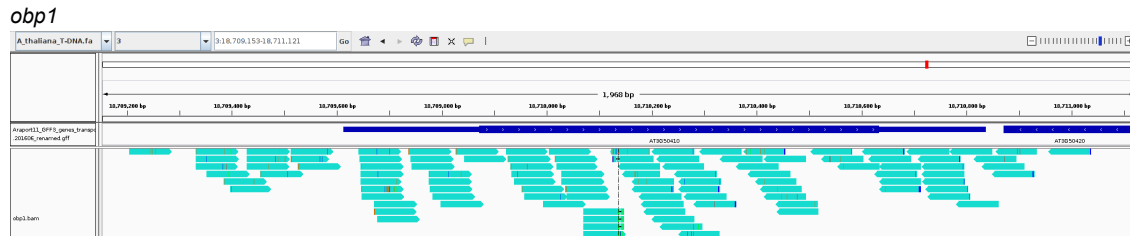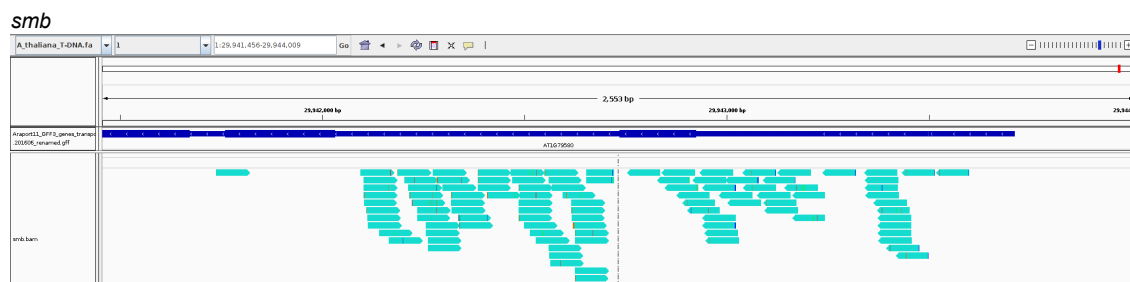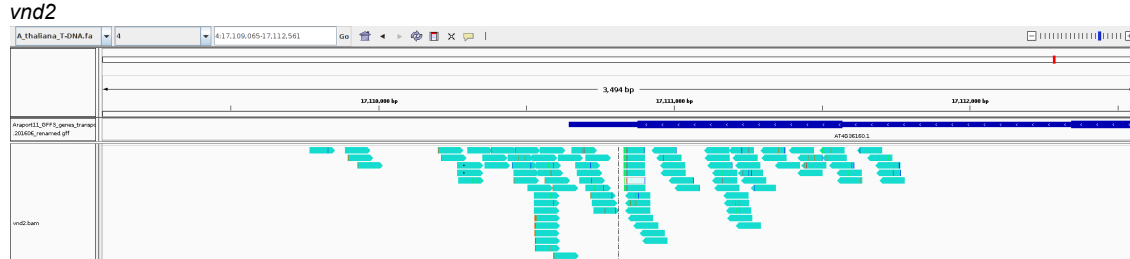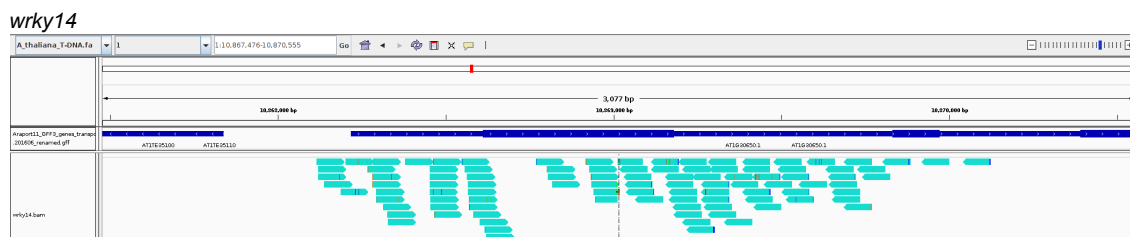

**Fig. S5 Results of the whole-genome resequencing of the eight mutant lines of DREM-predicted TFs.** Reads coloured in blue map to the Arabidopsis genome at the position shown but have their mate read mapping to the T-DNA sequence. Only one such insertion was found in each of the mutant lines, at the predicted position: For *athb15* (SALK\_140350C), in the immediate promoter of AT1G52150 between 19,414,788 and 19,414,820 bp; for *athb25* (SALK\_133857C), in the 5' UTR of AT5G65410 around 26,136,131 bp; for *hat2* (SALK\_091887C), in the last exon of AT5G47370 at 19,216,555 bp; for *lmi1* (SALK\_131946C), in the second and exon of AT5G03790 at 1,006,016 bp; for *obp1* (SALK\_049540C), in the first exon of AT3G50410 at 18,710,142 bp; for *smb* (SALK\_143526C), towards the 5' end of AT1G79580 between 29,942,720 and 29,942,742 bp; for *vnd2* (SALK\_026864C), in the 3' UTR of AT4G36160 between 17,110,800 and 17,110,832 bp; and for *wrky14* (SALK\_105170C), in the first exon of AT1G30650 at 10,869,016 bp. No such read pairs were found in resequencing wild-type Col-0.

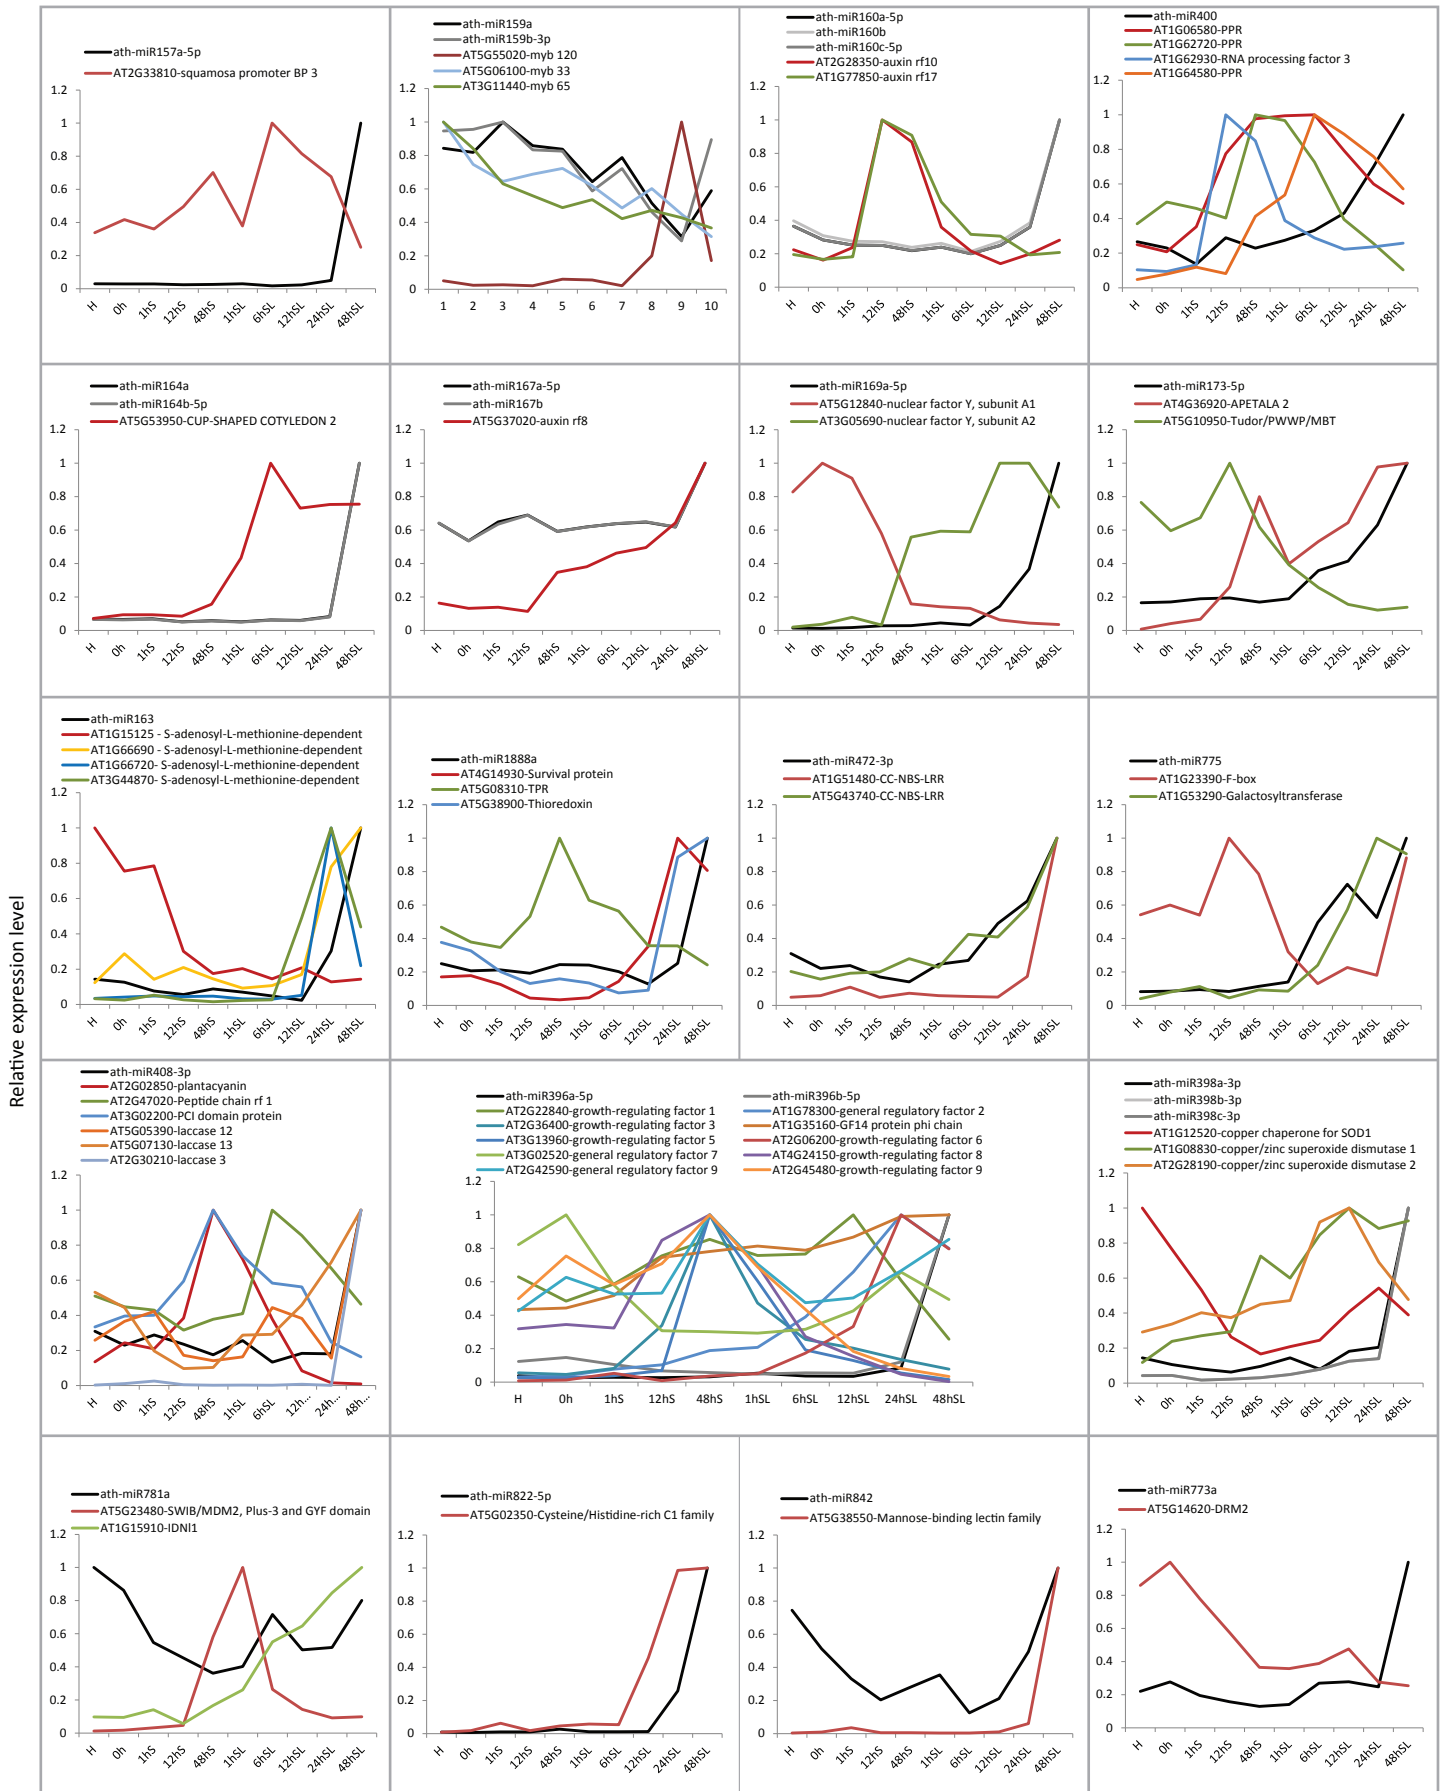

**Fig. S6** Differential expression of miRNAs over seed germination. Expression profiles of all the miRNAs with known experimentally validated genes, that were differentially regulated during seed germination.

**A**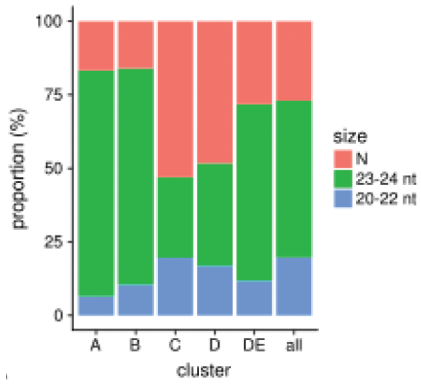**B**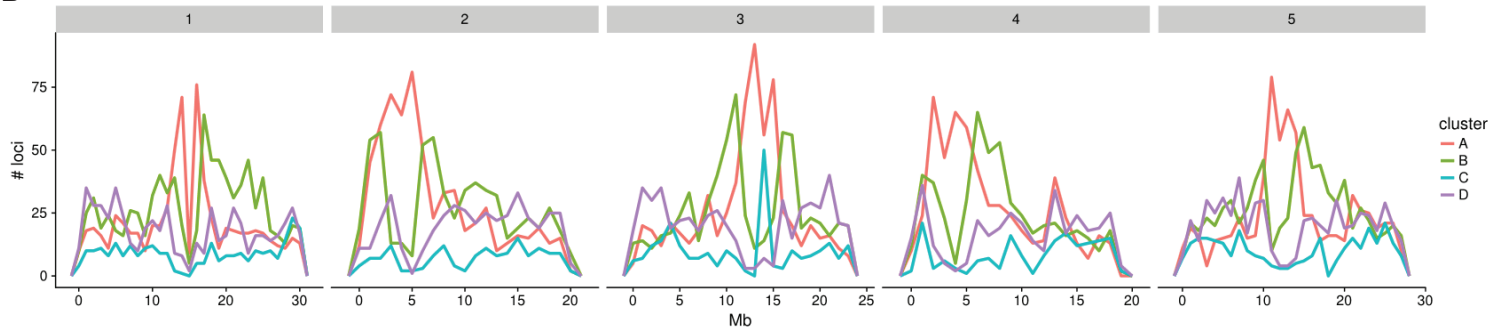**C**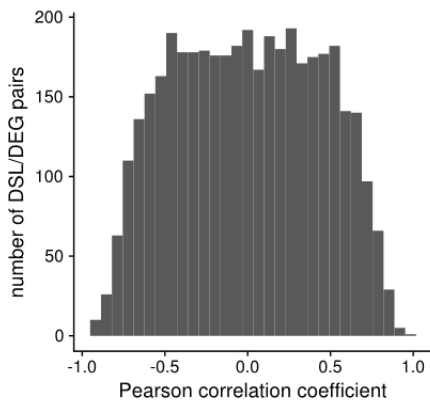

**Fig. S7** (A) Dominant sRNA size class in the four clusters, differentially expressed loci (DE) and for all loci (all). Loci where less than 80% of the reads are in the 20–24-nt range are classified as “N”. (B) Distribution of the differential sRNA loci along the 5 Arabidopsis chromosomes (1 Mb bins). (C) Correlation between 20 – 22-nt sRNA loci and the expression of their target genes.

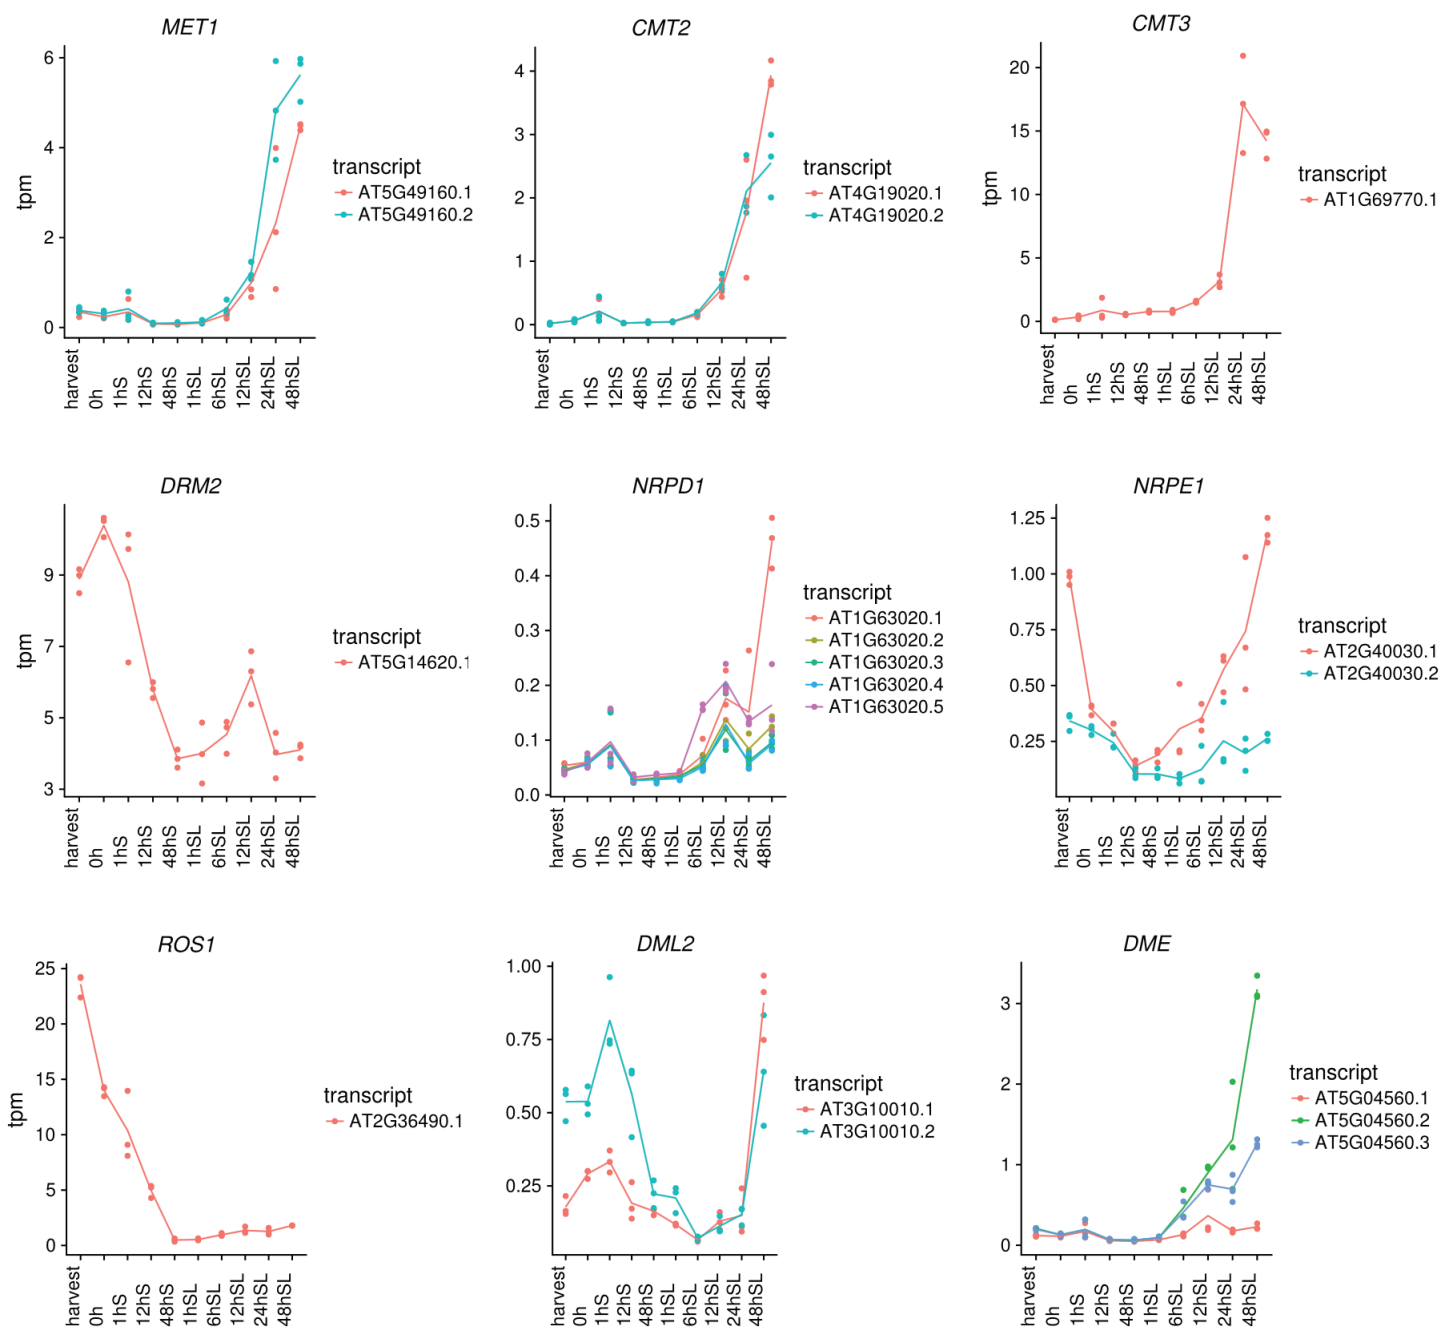

**Fig. S8** Expression of the methylases, demethylases and Pol IV/V main subunits. Tpm: Transcripts per million.



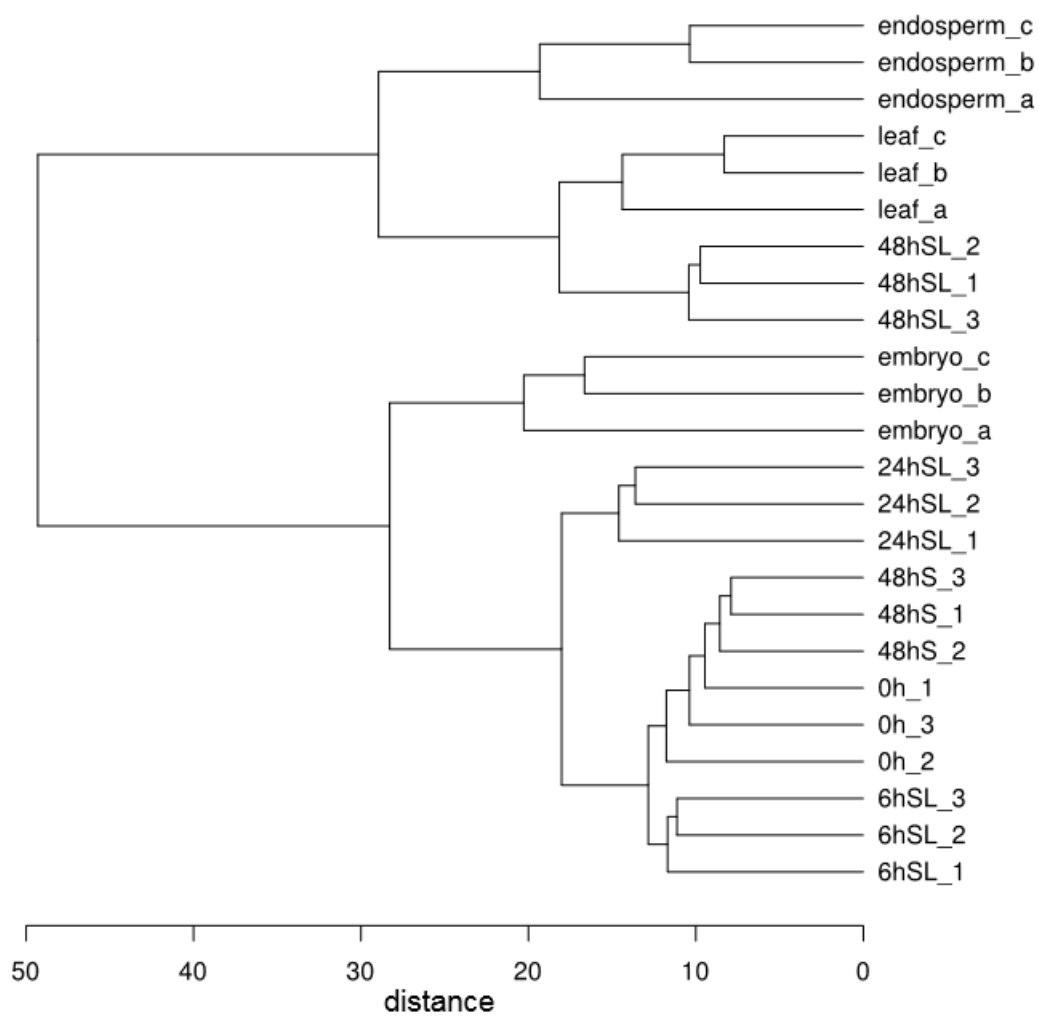

**Fig S9.** Hierarchical clustering of methylomes from our time course and other *Arabidopsis* tissues, based on the Euclidean distance of methylation levels of the 12,654 CHH DMRs, agglomerated by complete linkage. Labels: embryo\_a and endosperm\_a are from 7-9 days after pollination (DAP) Col-0 samples (Hsieh2009, GSE15922). Embryo\_b and endosperm\_b correspond to 7-8 DAP Col x Ler samples, and embryo\_c and endosperm\_c derive from the reciprocal Ler x Col cross (Ibarra2012, GSE38935). Leaf\_a, b and c are 3-week old Col-0 leaf samples (Stroud2014, GSE39901, SRR534177, SRR534193, SRR2056571-666).

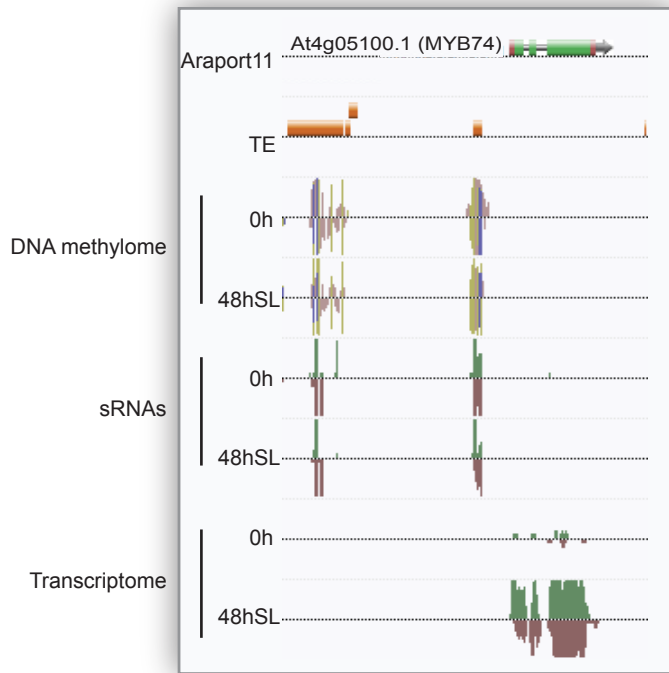

**Fig. S10** AtMYB74 during seed germination. The corresponding nearby differential methylation and sRNAs in the promoter region is seen, as well as the RNA expression for this gene in the AnnoJ genome browser. Note, only the 0 h and 48 h SL samples are shown.
